# Supplementary material
Source: Springer Nature journal article supplement (https://www.springermedizin.de/resource/supplementary/13054_2012_1905_MOESM1_ESM.pdf/9711832)

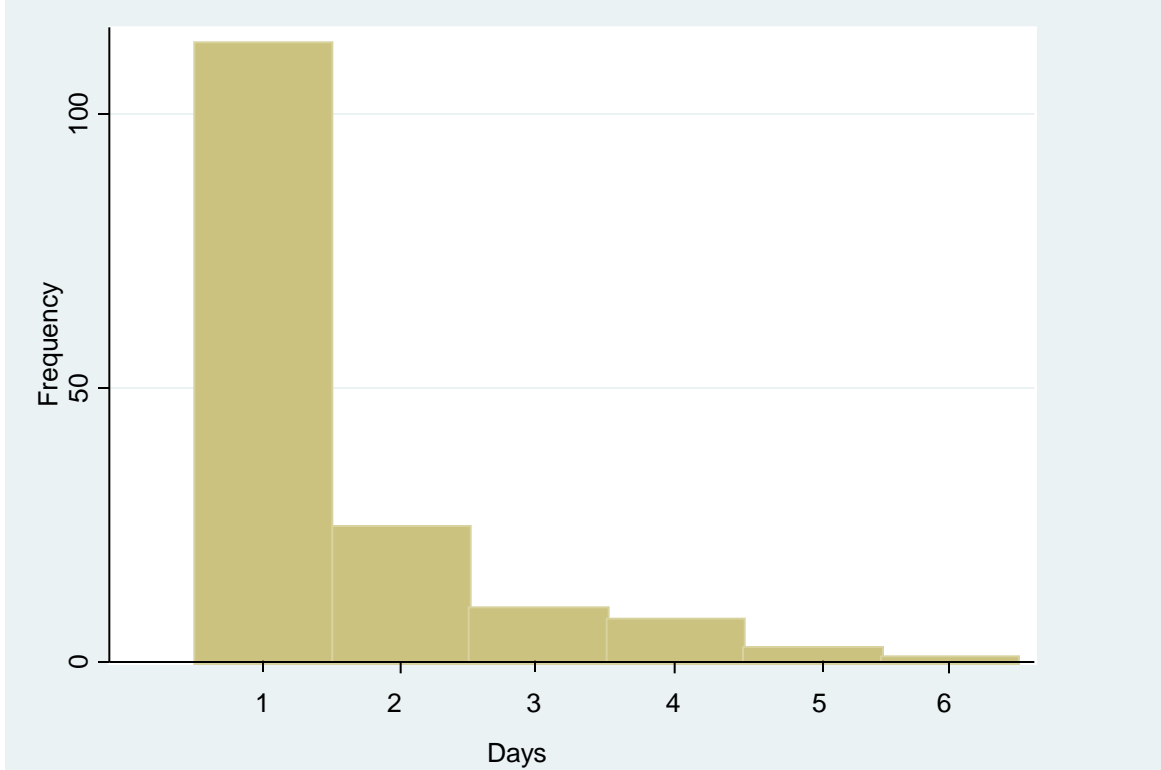

Supplement: MOESM1 [file 9711832]
